# Supplementary material for: Partially methylated domains are hypervariable in breast cancer and fuel widespread CpG island hypermethylation
Source: PubMed Central journal article supplement (PMC6465362; doi:10.1038/s41467-019-09828-0), 2019-04-15
Supplement: 41467_2019_9828_MOESM3_ESM.pdf [file 41467_2019_9828_MOESM3_ESM.pdf]

## Description of Additional Supplementary Information

File Name: Supplementary Data 1

Description: Quality metrics and global methylation values from whole-genome bisulfite.

File Name: Supplementary Data 2

Description: Clinical and molecular data of the 30 breast tumor samples analyzed by whole-genome bisulfite sequencing.

File Name: Supplementary Data 3

Description: PMD frequency of all annotated CpG islands.

File Name: Supplementary Data 4

Description: Genes that are downregulated at least 2.5 log<sub>2</sub>-fold when inside PMDs.

File Name: Supplementary Data 5

Description: External data used in this study.
